# Supplementary material for: Elucidating the Response of Diverse Faba Bean Genotypes to Powdery Mildew Infection
Source: MDPI journal article supplement (doi:10.3390/agronomy14040663), 2024-03-25
Supplement: s1 [file s1]

**Table S1.** Origin of the different accessions evaluated in the experiments under controlled conditions for their response to infection by powdery mildew. IFAPA: Instituto Andaluz de Investigación y Formación Agraria, Pesquera, Alimentaria y de la Producción Ecológica (Spain). ICARDA: International Center for Agricultural Research in the Dry Areas (Lebanon).

| <b>Accession</b> | <b>Origin</b>  |
|------------------|----------------|
| 095-1            | IFAPA          |
| 132-1            | ICARDA         |
| 135-1            | ICARDA         |
| 158-1            | ICARDA         |
| Alameda          | Commercial cv. |
| Arrechana        | Commercial cv. |
| Borjana          | Commercial cv. |
| BPL 261          | ICARDA         |
| BPL 710          | ICARDA         |
| Brocal           | Commercial cv. |
| Claro de Luna    | Commercial cv. |
| CORE 1067        | IFAPA          |
| ILB 365          | ICARDA         |
| ILB-4708         | ICARDA         |
| ILB-5284         | ICARDA         |
| Joya             | Commercial cv. |
| Messire          | Commercial cv. |
| Protabón         | Commercial cv. |
| Prothabat        | Commercial cv. |
| Quijote          | Commercial cv. |
| V-1250           | IFAPA          |
| V-274            | IFAPA          |
| V-377            | IFAPA          |
| V-404            | IFAPA          |
| V-441            | IFAPA          |
| V-513            | IFAPA          |
| V-977            | IFAPA          |

**Table S2.** Original dataset of corrected severity for the first experiment under controlled conditions for the evaluation of 19 accessions of faba bean and 1 of pea to infection by powdery mildew.

| Accession | Replication | Corrected severity |
|-----------|-------------|--------------------|
| 095-1     | 1           | 14.00              |
| 095-1     | 2           | 5.33               |
| 095-1     | 3           | 8.33               |
| 132-1     | 1           | 7.00               |
| 132-1     | 2           | 9.67               |
| 132-1     | 3           | 8.67               |
| 135-1     | 1           | 13.00              |
| 135-1     | 2           | 5.67               |
| 135-1     | 3           | 6.67               |
| BPL-261   | 1           | 11.00              |
| BPL-261   | 2           | 3.33               |
| BPL-261   | 3           | 10.00              |
| BPL-710   | 1           | 0.67               |
| BPL-710   | 2           | 2.33               |
| BPL-710   | 3           | 2.67               |
| BROCAL    | 1           | 29.00              |
| BROCAL    | 2           | 17.33              |
| BROCAL    | 3           | 36.67              |
| CORE 1067 | 1           | 35.00              |
| CORE 1067 | 2           | 38.67              |
| CORE 1067 | 3           | 26.67              |
| 158-1     | 1           | 6.33               |
| 158-1     | 2           | 7.67               |
| 158-1     | 3           | 3.00               |
| ILB-365   | 1           | 23.33              |
| ILB-365   | 2           | 27.33              |
| ILB-365   | 3           | 31.67              |
| ILB-4708  | 1           | 13.33              |
| ILB-4708  | 2           | 5.33               |
| ILB-4708  | 3           | 17.33              |
| ILB-5284  | 1           | 4.33               |
| ILB-5284  | 2           | 2.67               |
| ILB-5284  | 3           | 2.33               |
| Messire   | 2           | 66.33              |
| Messire   | 3           | 65.00              |
| Messire   | 1           | 63.33              |
| V-1250    | 1           | 59.33              |
| V-1250    | 2           | 35.33              |
| V-1250    | 3           | 7.67               |
| V-274     | 1           | 23.67              |
| V-274     | 1           | 26.33              |
| V-274     | 2           | 23.67              |
| V-377     | 1           | 38.33              |
| V-377     | 2           | 32.00              |
| V-377     | 3           | 32.67              |
| V-404     | 1           | 31.67              |
| V-404     | 2           | 66.67              |
| V-439     | 1           | 16.33              |
| V-439     | 2           | 17.67              |
| V-439     | 3           | 28.67              |
| V-441     | 1           | 30.67              |
| V-441     | 2           | 26.33              |
| V-441     | 3           | 18.00              |
| V-513     | 1           | 35.33              |
| V-513     | 2           | 32.67              |
| V-977     | 1           | 30.00              |
| V-977     | 2           | 50.33              |
| V-977     | 3           | 23,33              |

**Table S3.** Original dataset of corrected severity for the second experiment under controlled conditions for the evaluation of 18 accessions of faba bean to infection by powdery mildew.

| Accession     | Replication | Corrected severity |
|---------------|-------------|--------------------|
| 132-1         | 1           | 27.25              |
| 132-1         | 2           | 34.40              |
| 135-1         | 1           | 24.21              |
| 135-1         | 2           | 38.82              |
| 135-1         | 3           | 8.75               |
| 158-1         | 1           | 27.25              |
| 158-1         | 2           | 18.13              |
| 158-1         | 3           | 22.93              |
| Alameda       | 1           | 45.50              |
| Alameda       | 2           | 50.19              |
| Alameda       | 3           | 29.69              |
| Arrechana     | 1           | 9.75               |
| Arrechana     | 2           | 9.00               |
| Arrechana     | 3           | 21.05              |
| Borjana       | 1           | 16.14              |
| Borjana       | 2           | 20.94              |
| Borjana       | 3           | 19.66              |
| BPL-710       | 1           | 7.29               |
| BPL-710       | 2           | 8.83               |
| BPL-710       | 3           | 8.75               |
| Brocal        | 1           | 56.29              |
| Brocal        | 2           | 29.13              |
| Brocal        | 3           | 45.58              |
| Claro de Luna | 1           | 18.75              |
| Claro de Luna | 2           | 29.17              |
| Claro de Luna | 3           | 35.64              |
| ILB-4708      | 1           | 8.67               |
| ILB-4708      | 3           | 9.00               |
| Joya          | 1           | 31.14              |
| Joya          | 2           | 39.25              |
| Joya          | 3           | 27.67              |
| Protabón      | 1           | 22.75              |
| Protabón      | 2           | 13.19              |
| Protabón      | 3           | 22.57              |
| Prothabat     | 1           | 24.71              |
| Prothabat     | 2           | 50.86              |
| Prothabat     | 3           | 20.19              |
| Quijote       | 1           | 47.71              |
| Quijote       | 2           | 66.17              |
| Quijote       | 3           | 54.18              |
| V-1250        | 1           | 30.83              |
| V-1250        | 2           | 33.64              |
| V-404         | 1           | 61.50              |
| V-404         | 2           | 55.69              |
| V-404         | 3           | 32.57              |
| V-977         | 1           | 32.64              |
| V-977         | 2           | 23.57              |
| V-977         | 3           | 20.19              |
